# Supplementary material for: Wavefunction theory and density functional theory analysis of ground and excited electronic states of TaB and WB
Source: Royal Society of Chemistry journal article supplement (doi:10.1039/d4cp02202e), 2024-01-01
Supplement: d4cp02202e1.pdf [file d4cp02202e1.pdf]

Electronic Supplementary Information

## Wavefunction theory and density functional theory analysis of ground and excited states of TaB and WB

Isuru R. Ariyaratna

*Physics and Chemistry of Materials (T-1), Los Alamos National Laboratory, Los Alamos, NM 87545, USA*

Email: isuru@lanl.gov

### Contents

|                                                                                                                                           |         |
|-------------------------------------------------------------------------------------------------------------------------------------------|---------|
| <b>Table S1</b> MRCI $T_e$ and experimental $T_e$ values Ta atom                                                                          | Page S2 |
| <b>Table S2</b> $r_e$ , $T_e$ , $\omega_e$ , $\omega_e x_e$ values and % compositions of spin-orbit states of TaB                         | Page S2 |
| <b>Table S3</b> $D_e$ , $r_e$ , $\omega_e$ , and $\omega_e x_e$ values of TaB( $1^3\Pi$ ) under various functionals of DFT                | Page S3 |
| <b>Table S4</b> % DFT errors of $D_e$ , $r_e$ , $\omega_e$ , and $\omega_e x_e$ of TaB( $1^3\Pi$ ) compared to MRCI                       | Page S3 |
| <b>Table S5</b> MRCI $T_e$ and experimental $T_e$ values W atom                                                                           | Page S4 |
| <b>Table S6</b> % compositions of spin-orbit states of WB                                                                                 | Page S4 |
| <b>Table S7</b> $D_e$ , $r_e$ , $\omega_e$ , and $\omega_e x_e$ values of WB( $1^6\Pi$ and $1^4\Delta$ ) under various functionals of DFT | Page S5 |
| <b>Table S8</b> % DFT errors of $D_e$ , $r_e$ , $\omega_e$ , and $\omega_e x_e$ of Wb( $1^6\Pi$ ) compared to MRCI                        | Page S5 |
| <b>Table S9</b> % DFT errors of $D_e$ , $r_e$ , $\omega_e$ , and $\omega_e x_e$ of Wb( $1^4\Delta$ ) compared to MRCI                     | Page S6 |
| <b>Figure S1</b> CASSCF PECs of TaB                                                                                                       | Page S7 |
| <b>Figure S2</b> CASSCF PECs of WB                                                                                                        | Page S8 |
| <b>Figure S3</b> $D_e$ of WB( $1^4\Delta$ ) under various functionals of DFT                                                              | Page S9 |

**Table S1.** Excitation energies ( $T_e$ ,  $\text{cm}^{-1}$ ) for lowest states of Ta at the MRCI level under the cc-pVQZ-PP (60ECP) basis set and experimental excitation energies.

| State        | MRCI/CAS(5,9) <sup>a</sup> | Experiment <sup>b</sup> |
|--------------|----------------------------|-------------------------|
| $a^4F_{3/2}$ | 0                          | 0.00                    |
| $a^4F_{5/2}$ | 2014                       | 2010.10                 |
| $a^4F_{7/2}$ | 4131                       | 3963.92                 |
| $a^4F_{9/2}$ | 5804                       | 5621.04                 |
| $a^4P_{3/2}$ | 6559                       | 6068.91                 |
| $a^4P_{1/2}$ | 6774                       | 6049.42                 |
| $a^4P_{5/2}$ | 10112                      | 9253.43                 |
| $a^2G_{7/2}$ | 10465                      | 9705.38                 |
| $a^6D_{3/2}$ | 10748                      | 9975.81                 |
| $a^6D_{1/2}$ | 10846                      | 9758.97                 |
| $a^2G_{9/2}$ | 11399                      | 10690.32                |

<sup>a</sup>The active space consists of 6s, 5d, and 6p orbitals of Ta.

<sup>b</sup>Experimental excitation energies of Ta were obtained from A. Kramida, Y. Ralchenko and J. Reader, NIST Atomic Spectra Database (Version 5.3). National Institute of Standards and Technology, Gaithersburg, MD. <http://physics.nist.gov/asd>.

**Table S2.** Bond length ( $r_e$ , Å), excitation energy ( $T_e$ ,  $\text{cm}^{-1}$ ), harmonic vibrational frequency ( $\omega_e$ ,  $\text{cm}^{-1}$ ), anharmonicity ( $\omega_e x_e$ ,  $\text{cm}^{-1}$ ), and % compositions of the low-lying  $\Omega = 0^+$ ,  $0^-$ , 1, 2, 1,  $0^+$ ,  $0^-$ , 2, and 1 spin-orbit states of TaB at MRCI.

| $\Omega$ | $r_e$ | $T_e$ | $\omega_e$ | $\omega_e x_e$ | Composition <sup>a</sup>                                                                             |
|----------|-------|-------|------------|----------------|------------------------------------------------------------------------------------------------------|
| $0^+$    | 2.118 | 0     | 519        | 2.3            | 56.192% $1^5\Delta$ , 30.7% $1^3\Pi$ , 4.556% $2^3\Pi$ , 7.395% $1^1\Sigma^+$ , 1.098% $1^3\Sigma^-$ |
| $0^-$    | 2.139 | 341   | 533        | 7.1            | 80.802% $1^5\Delta$ , 16.968% $1^3\Pi$ , 2.132% $2^3\Pi$                                             |
| 1        | 2.124 | 1238  | 423        | 1.8            | 76.844% $1^5\Delta$ , 19.909% $1^3\Pi$ , 2.056% $1^3\Sigma^+$                                        |
| 2        | 2.111 | 1926  | 433        | -6.6           | 53.594 $1^3\Pi$ , 44.793% $1^5\Delta$                                                                |
| 1        | 2.014 | 2147  | 569        | 42.9           | 91.634% $1^3\Pi$ , 7.596% $1^5\Delta$                                                                |
| $0^+$    | 2.086 | 2745  | 495        | -3.2           | 99.96% $1^5\Pi$                                                                                      |
| $0^-$    | 2.024 | 3017  | 573        | 21.7           | 77.718% $1^5\Pi$ , 12.173% $1^3\Sigma^+$ , 7.700% $2^3\Pi$ , 1.540% $1^5\Delta$                      |
| 2        | 2.095 | 3434  | 627        | 8.5            | 57.616% $1^3\Pi$ , 36.697% $1^5\Delta$                                                               |
| 1        | 2.057 | 3599  | 563        | -0.2           | 42.939% $1^3\Pi$ , 39.982% $1^5\Delta$ , 11.500% $1^5\Phi$ , 2.190% $1^3\Sigma^-$ , 1.243% $1^1\Pi$  |

<sup>a</sup>Only dominant compositions are listed.

**Table S3.** Dissociation energy with respect to Ta(<sup>4</sup>F)+B(<sup>2</sup>P) fragments ( $D_e$ , kcal/mol), bond distance ( $r_e$ , Å), harmonic vibrational frequency ( $\omega_e$ , cm<sup>-1</sup>), and anharmonicity ( $\omega_e x_e$ , cm<sup>-1</sup>) of the 1<sup>3</sup>Π electronic state of TaB under various exchange-correlation functionals.

| Family of functional | DFA               | $D_e$ | $r_e$ | $\omega_e$ | $\omega_e x_e$ |
|----------------------|-------------------|-------|-------|------------|----------------|
| GGA                  | BP86              | 77.87 | 1.990 | 706        | 6.6            |
|                      | BLYP              | 68.35 | 2.003 | 682        | 6.9            |
|                      | PBE               | 80.36 | 1.988 | 721        | 3.6            |
| MGGA                 | TPSS              | 72.76 | 1.999 | 704        | 5.1            |
|                      | MN15-L            | 69.10 | 2.007 | 751        | 4.3            |
| global GGA Hybrid    | B3LYP             | 61.13 | 1.980 | 697        | 3.5            |
|                      | B3P86             | 70.34 | 1.967 | 723        | 3.4            |
|                      | B3PW91            | 68.66 | 1.970 | 719        | 3.2            |
|                      | PBE0              | 68.62 | 1.965 | 727        | 3.4            |
| MGGA Hybrid          | TPSSh             | 62.81 | 1.923 | 674        | 2.6            |
|                      | M06               | 72.49 | 1.949 | 721        | 3.9            |
|                      | M06-2X            | 66.15 | 1.948 | 741        | 4.7            |
|                      | MN15              | 71.48 | 1.959 | 724        | 3.9            |
| RSH                  | LRC- $\omega$ PBE | 59.13 | 1.862 | 844        | 4.6            |
|                      | CAM-B3LYP         | 56.02 | 1.959 | 725        | 3.7            |
|                      | $\omega$ B97X     | 56.98 | 1.954 | 732        | 3.7            |

**Table S4.** % DFT errors of dissociation energy ( $D_e$ ), bond distance ( $r_e$ ), harmonic vibrational frequency ( $\omega_e$ ), and anharmonicity ( $\omega_e x_e$ ) of the 1<sup>3</sup>Π electronic state of TaB. The DFT errors are calculated with respect to the MRCI values.

| Family of functional | DFA               | $D_e$ | $r_e$ | $\omega_e$ | $\omega_e x_e$ |
|----------------------|-------------------|-------|-------|------------|----------------|
| GGA                  | BP86              | 24.9  | -1.1  | 6.5        | 78.4           |
|                      | BLYP              | 9.6   | -0.4  | 2.9        | 86.5           |
|                      | PBE               | 28.8  | -1.2  | 8.7        | -2.7           |
| MGGA                 | TPSS              | 16.7  | -0.6  | 6.2        | 37.8           |
|                      | MN15-L            | 10.8  | -0.2  | 13.3       | 16.2           |
| Global GGA Hybrid    | B3LYP             | -2.0  | -1.6  | 5.1        | -5.4           |
|                      | B3P86             | 12.8  | -2.2  | 9.0        | -8.1           |
|                      | B3PW91            | 10.1  | -2.1  | 8.4        | -13.5          |
|                      | PBE0              | 10.0  | -2.3  | 9.7        | -8.1           |
| MGGA Hybrid          | TPSSh             | 0.7   | -4.4  | 1.7        | -29.7          |
|                      | M06               | 16.2  | -3.1  | 8.7        | 5.4            |
|                      | M06-2X            | 6.1   | -3.2  | 11.8       | 27.0           |
|                      | MN15              | 14.6  | -2.6  | 9.2        | 5.4            |
| RSH                  | LRC- $\omega$ PBE | -5.2  | -7.5  | 27.3       | 24.3           |
|                      | CAM-B3LYP         | -10.2 | -2.6  | 9.4        | 0.0            |
|                      | $\omega$ B97X     | -8.6  | -2.9  | 10.4       | 0.0            |

**Table S5.** Excitation energies (cm<sup>-1</sup>) for lowest states of W at the MRCI level under the cc-pVQZ-PP (60ECP) basis set and experimental excitation energies.

| State                       | MRCI/CAS(6,9) <sup>a</sup> | Experiment <sup>b</sup> |
|-----------------------------|----------------------------|-------------------------|
| <sup>5</sup> D <sub>0</sub> | 0                          | 0                       |
| <sup>5</sup> D <sub>1</sub> | 1212                       | 1670.29                 |
| <sup>5</sup> D <sub>2</sub> | 2987                       | 3325.53                 |
| <sup>7</sup> S <sub>3</sub> | 3210                       | 2951.29                 |
| <sup>5</sup> D <sub>3</sub> | 4646                       | 4830.33                 |
| <sup>5</sup> D <sub>4</sub> | 5873                       | 6219.33                 |

<sup>a</sup>The active space consists of 6s, 5d, and 6p orbitals of W.

<sup>b</sup>Experimental excitation energies of Ta were obtained from A. Kramida, Y. Ralchenko and J. Reader; *NIST Atomic Spectra Database (Version 5.3)*. National Institute of Standards and Technology, Gaithersburg, MD. <http://physics.nist.gov/asd>.

**Table S6.** % compositions and vertical excitation energies (VEE, cm<sup>-1</sup>) of the low-lying spin-orbit states of WB under MRCI at r<sub>e</sub> = 1.971 Å.

| Ω   | VEE  | Composition <sup>a</sup>                                                                                            |
|-----|------|---------------------------------------------------------------------------------------------------------------------|
| 7/2 | 0    | 91.010% 1 <sup>6</sup> Π, 8.713% 1 <sup>4</sup> Δ                                                                   |
| 5/2 | 63   | 82.101% 1 <sup>6</sup> Π, 13.792% 1 <sup>4</sup> Δ, 2.025% 1 <sup>4</sup> Π                                         |
| 3/2 | 78   | 63.251% 1 <sup>6</sup> Π, 24.818% 1 <sup>4</sup> Δ, 5.483% 1 <sup>4</sup> Π                                         |
| 1/2 | 113  | 41.954% 1 <sup>4</sup> Δ, 38.518% 1 <sup>6</sup> Π, 11.907% 1 <sup>4</sup> Π, 2.374% 1 <sup>2</sup> Σ <sup>+</sup>  |
| 1/2 | 790  | 46.145% 1 <sup>6</sup> Π, 29.166% 1 <sup>4</sup> Π, 8.736% 1 <sup>4</sup> Δ, 8.384% 1 <sup>2</sup> Σ <sup>+</sup>   |
| 1/2 | 1317 | 51.682% 1 <sup>6</sup> Π, 6.717% 1 <sup>6</sup> Σ <sup>+</sup> , 14.249% 1 <sup>4</sup> Δ, 15.352% 1 <sup>4</sup> Π |
| 3/2 | 1340 | 92.885% 1 <sup>6</sup> Π, 3.666% 1 <sup>6</sup> Σ <sup>+</sup>                                                      |

<sup>a</sup>Only dominant compositions are listed.

**Table S7.** Dissociation energy with respect to W(<sup>7</sup>S)+B(<sup>2</sup>P) fragments ( $D_e$ , kcal/mol), bond distance ( $r_e$ , Å), harmonic vibrational frequency ( $\omega_e$ , cm<sup>-1</sup>), and anharmonicity ( $\omega_e x_e$ , cm<sup>-1</sup>) of the 1<sup>6</sup>Π and 1<sup>4</sup>Δ electronic states of WB under various exchange-correlation functionals.

| Family of functional | DFA               | 1 <sup>6</sup> Π |       |            |                | 1 <sup>4</sup> Δ <sup>a</sup> |       |            |                |
|----------------------|-------------------|------------------|-------|------------|----------------|-------------------------------|-------|------------|----------------|
|                      |                   | $D_e$            | $r_e$ | $\omega_e$ | $\omega_e x_e$ | $D_e$                         | $r_e$ | $\omega_e$ | $\omega_e x_e$ |
| GGA                  | BP86              | 75.79            | 1.960 | 739        | 4.3            | 70.44                         | 1.861 | 849        | 3.6            |
|                      | BLYP              | 74.65            | 1.960 | 728        | 4.1            | 73.19                         | 1.868 | 834        | 3.5            |
|                      | PBE               | 75.72            | 1.958 | 740        | 4.4            | 69.14                         | 1.858 | 853        | 3.6            |
| MGGA                 | TPSS              | 71.45            | 1.966 | 726        | 4.7            | 64.95                         | 1.863 | 847        | 3.7            |
|                      | MN15-L            | 62.46            | 1.978 | 693        | 6.4            | -                             | -     | -          | -              |
| global GGA Hybrid    | B3LYP             | 66.91            | 1.954 | 736        | 5.2            | 63.87                         | 1.853 | 853        | 3.8            |
|                      | B3P86             | 68.38            | 1.946 | 744        | 5.3            | 61.81                         | 1.844 | 858        | 4.0            |
|                      | B3PW91            | 64.15            | 1.952 | 727        | 5.5            | 56.06                         | 1.848 | 863        | 4.2            |
|                      | PBE0              | 64.65            | 1.951 | 721        | 5.6            | 55.96                         | 1.845 | 859        | 3.7            |
| MGGA Hybrid          | TPSSh             | 67.60            | 1.962 | 718        | 3.7            | 60.33                         | 1.857 | 857        | 6.7            |
|                      | M06               | 71.02            | 1.932 | 775        | 4.6            | -                             | -     | -          | -              |
|                      | MN15              | 69.60            | 1.930 | 782        | 5.8            | 63.63                         | 1.836 | 865        | 3.8            |
| RSH                  | LRC- $\omega$ PBE | 57.59            | 1.944 | 684        | 6.0            | 48.86                         | 1.828 | 653        | 4.8            |
|                      | CAM-B3LYP         | 63.54            | 1.941 | 735        | 6.1            | 60.27                         | 1.838 | 871        | 4.6            |
|                      | $\omega$ B97X     | 68.18            | 1.932 | 755        | 6.4            | 68.43                         | 1.832 | 867        | 5.0            |

<sup>a</sup> Due to convergence issues the DFT MN15-L and M06 results of 1<sup>4</sup>Δ are not listed.

**Table S8.** % DFT errors of dissociation energy ( $D_e$ ), bond distance ( $r_e$ ), harmonic vibrational frequency ( $\omega_e$ ), and anharmonicity ( $\omega_e x_e$ ) of the 1<sup>6</sup>Π electronic state of WB. The DFT errors are calculated with respect to the MRCI values.

| Family of functional | DFA               | $D_e$ | $r_e$ | $\omega_e$ | $\omega_e x_e$ |
|----------------------|-------------------|-------|-------|------------|----------------|
| GGA                  | BP86              | 19.7  | -0.6  | 2.9        | 7.5            |
|                      | BLYP              | 17.9  | -0.6  | 1.4        | 2.5            |
|                      | PBE               | 19.6  | -0.7  | 3.1        | 10.0           |
| MGGA                 | TPSS              | 12.8  | -0.3  | 1.1        | 17.5           |
|                      | MN15-L            | -1.4  | 0.4   | -3.5       | 60.0           |
| Global GGA Hybrid    | B3LYP             | 5.7   | -0.9  | 2.5        | 30.0           |
|                      | B3P86             | 8.0   | -1.3  | 3.6        | 32.5           |
|                      | B3PW91            | 1.3   | -1.0  | 1.3        | 37.5           |
|                      | PBE0              | 2.1   | -1.0  | 0.4        | 40.0           |
| MGGA Hybrid          | TPSSh             | 6.8   | -0.5  | 0.0        | -7.5           |
|                      | M06               | 12.2  | -2.0  | 7.9        | 15.0           |
|                      | MN15              | 9.9   | -2.1  | 8.9        | 45.0           |
| RSH                  | LRC- $\omega$ PBE | -9.0  | -1.4  | -4.7       | 50.0           |
|                      | CAM-B3LYP         | 0.3   | -1.5  | 2.4        | 52.5           |
|                      | $\omega$ B97X     | 7.7   | -2.0  | 5.2        | 60.0           |

**Table S9.** % DFT errors of dissociation energy ( $D_e$ ), bond distance ( $r_e$ ), harmonic vibrational frequency ( $\omega_e$ ), and anharmonicity ( $\omega_e x_e$ ) of the  $1^4\Delta$  electronic state of WB. The DFT errors are given with respect to the MRCI values.

| Family of functional | DFA               | $D_e$ | $r_e$ | $\omega_e$ | $\omega_e x_e$ |
|----------------------|-------------------|-------|-------|------------|----------------|
| GGA                  | BP86              | 17.4  | -0.8  | 3.2        | 9.1            |
|                      | BLYP              | 22.0  | -0.4  | 1.3        | 6.1            |
|                      | PBE               | 15.2  | -1.0  | 3.6        | 9.1            |
| MGGA                 | TPSS              | 8.3   | -0.7  | 2.9        | 12.1           |
| Global GGA Hybrid    | B3LYP             | 6.5   | -1.2  | 3.6        | 15.2           |
|                      | B3P86             | 3.0   | -1.7  | 4.3        | 21.2           |
|                      | B3PW91            | -6.6  | -1.5  | 4.9        | 27.3           |
|                      | PBE0              | -6.7  | -1.7  | 4.4        | 12.1           |
| MGGA Hybrid          | TPSSh             | 0.5   | -1.0  | 4.1        | 103.0          |
|                      | MN15              | 6.1   | -2.1  | 5.1        | 15.2           |
| RSH                  | LRC- $\omega$ PBE | -18.6 | -2.6  | -20.7      | 45.5           |
|                      | CAM-B3LYP         | 0.5   | -2.0  | 5.8        | 39.4           |
|                      | $\omega$ B97X     | 14.1  | -2.3  | 5.3        | 51.5           |

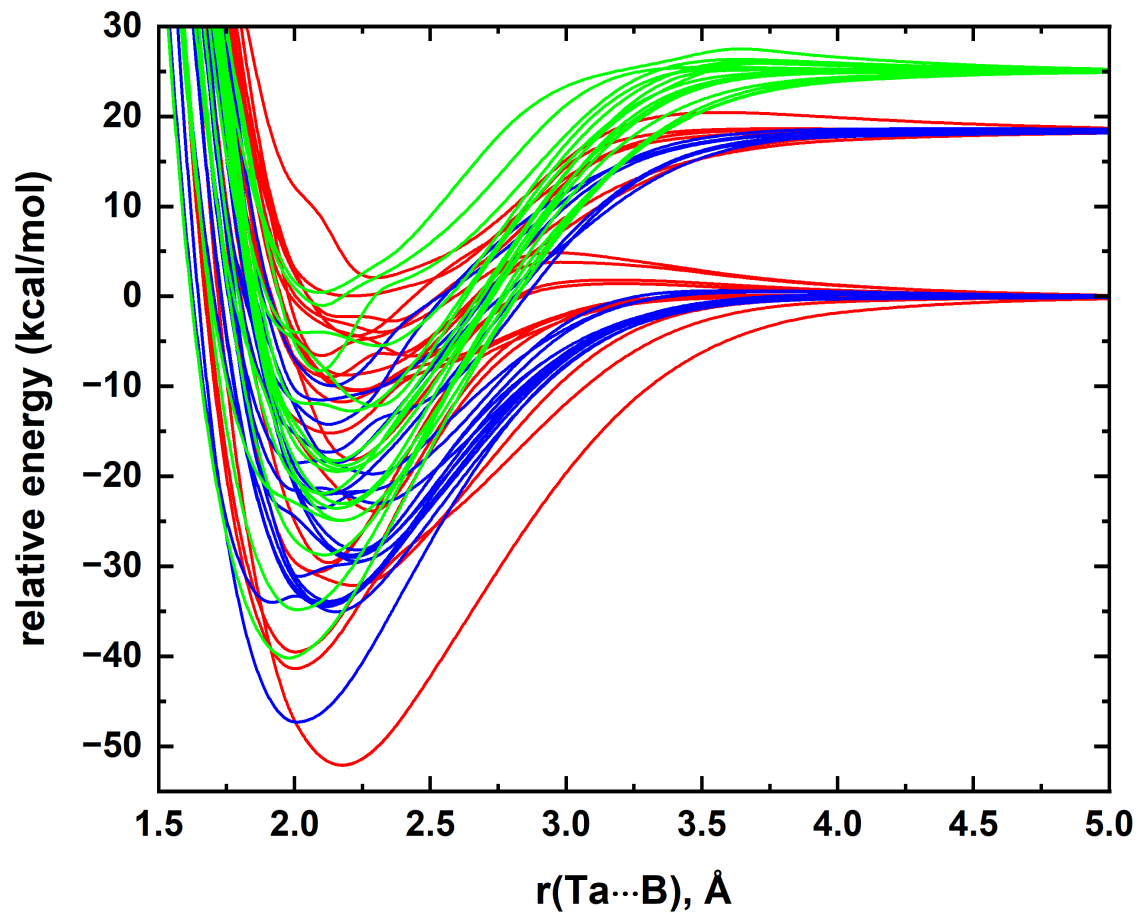

**Figure S1.** CASSCF PECs of TaB as a function of Ta...B distance [ $r(\text{Ta}\cdots\text{B})$ , Å]. Quintet, triplet, and singlet spin PECs are shown in red, blue, and green respectively.

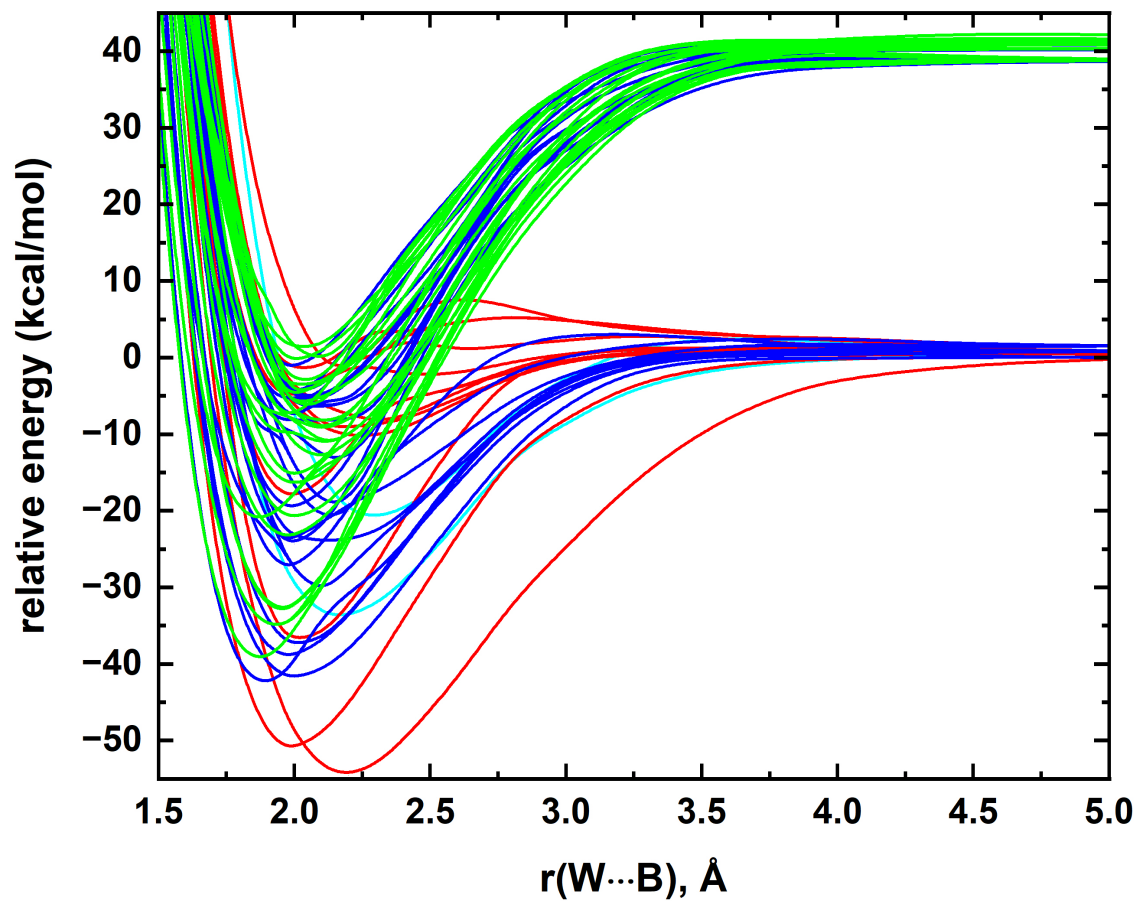

**Figure S2.** Studied CASSCF PECs of WB as a function of W...B distance [ $r(\text{W}\cdots\text{B})$ , Å]. Octet, sextet, quartet, and doublet spin PECs are shown in cyan, red, blue, and green respectively.



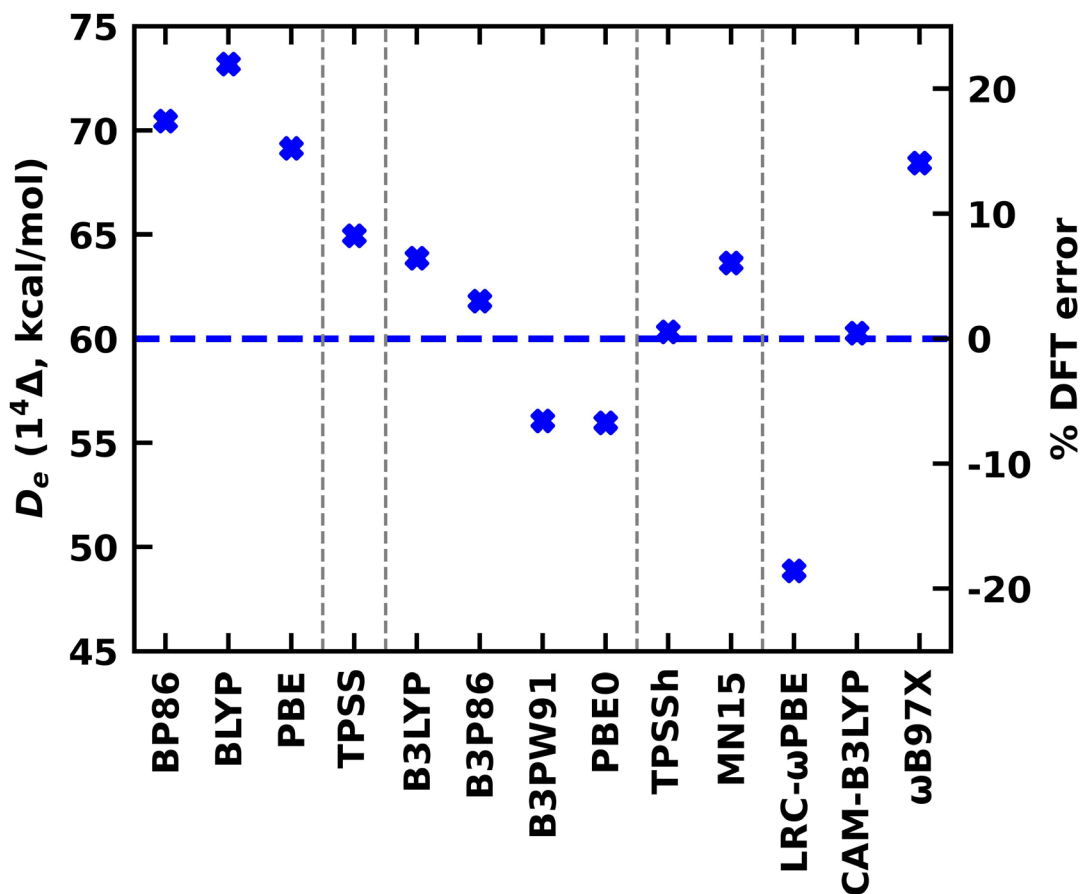

**Figure S3.** Dissociation energy ( $D_e$ , kcal/mol) of WB( $1^4\Delta$ ) obtained at various density functional approximations (blue cross marks). The families of density functionals are separated with vertical gray dashed lines and ordered by the rung on Jacob's ladder (left to right: GGA, MGGA, global GGA hybrid, MGGA hybrid, and RSH). The horizontal blue dashed line represents the MRCI  $D_e$ .
